# Supplementary material
Source: PubMed Central journal article supplement (PMC3321117)
Supplement: NIHMS359591-supplement-01.pdf [file NIHMS359591-supplement-01.pdf]

**SDC** Supplemental digital content is available through [direct URL citations](#) in the HTML and PDF versions of this article ([www.epidem.com](http://www.epidem.com)). This content is not peer-reviewed or copy-edited; it is the sole responsibility of the author.

**eAppendix 1**

**eTable 1. Crude and Adjusted<sup>a</sup> Association of Maternal Characteristics with Pregnancy Outcome among Singleton Pregnancies, Mid-Ohio Valley, 1990-2006**

| Maternal Characteristic              | N    | Miscarriage |                                   | N  | Stillbirth |                                   | N   | Preeclampsia |                                   |
|--------------------------------------|------|-------------|-----------------------------------|----|------------|-----------------------------------|-----|--------------|-----------------------------------|
|                                      |      | Crude OR    | Adjusted <sup>a</sup> OR (95% CI) |    | Crude OR   | Adjusted <sup>a</sup> OR (95% CI) |     | Crude OR     | Adjusted <sup>a</sup> OR (95% CI) |
| <b>Exposure Year</b>                 |      |             |                                   |    |            |                                   |     |              |                                   |
| 1990 – 1994                          | 445  | 1.0         | 1.0                               | 35 | 1.0        | 1.0                               | 179 | 1.0          | 1.0                               |
| 1995 – 1999                          | 450  | 1.0         | 1.0 (0.9, 1.2)                    | 31 | 0.9        | 0.9 (0.5, 1.4)                    | 235 | 1.2          | 1.3 (1.1, 1.6)                    |
| 2000 – 2005                          | 548  | 1.2         | 1.2 (1.0, 1.4)                    | 39 | 1.1        | 1.1 (0.7, 1.8)                    | 316 | 1.6          | 1.9 (1.5, 2.3)                    |
| <b>Age, years</b>                    |      |             |                                   |    |            |                                   |     |              |                                   |
| 14 – 20                              | 229  | 1.1         | 0.6 (0.5, 0.8)                    | 26 | 1.6        | 0.9 (0.5, 1.6)                    | 123 | 1.1          | 0.8 (0.7, 1.1)                    |
| 20 – 24                              | 418  | 1.0         | 1.0                               | 32 | 1.0        | 1.0                               | 246 | 1.0          | 1.0                               |
| 25 – 29                              | 374  | 1.0         | 1.5 (1.3, 1.8)                    | 24 | 0.9        | 1.4 (0.8, 2.5)                    | 215 | 1.0          | 1.2 (1.0, 1.5)                    |
| 30 – 34                              | 257  | 1.3         | 2.4 (2.0, 3.0)                    | 15 | 1.0        | 2.0 (1.0, 4.0)                    | 112 | 1.0          | 1.3 (1.0, 1.6)                    |
| 35 – 45                              | 165  | 2.5         | 5.3 (4.2, 6.8)                    | 8  | 1.6        | 3.3 (1.5, 7.4)                    | 34  | 0.9          | 1.2 (0.8, 1.7)                    |
| <b>Parity</b>                        |      |             |                                   |    |            |                                   |     |              |                                   |
| 0                                    | 1121 | 1.0         | 1.0                               | 79 | 1.0        | 1.0                               | 459 | 1.0          | 1.0                               |
| 1                                    | 230  | 0.3         | 0.2 (0.2, 0.2)                    | 18 | 0.3        | 0.2 (0.1, 0.4)                    | 180 | 0.5          | 0.4 (0.4, 0.5)                    |
| 2+                                   | 92   | 0.2         | 0.1 (0.1, 0.1)                    | 8  | 0.2        | 0.2 (0.1, 0.3)                    | 91  | 0.5          | 0.4 (0.3, 0.5)                    |
| <b>Education at interview, years</b> |      |             |                                   |    |            |                                   |     |              |                                   |
| <12                                  | 113  | 1.1         | 1.3 (1.0, 1.7)                    | 15 | 1.5        | 1.7 (0.9, 3.4)                    | 43  | 0.8          | 0.9 (0.6, 1.3)                    |
| 12                                   | 438  | 1.0         | 1.0                               | 39 | 1.0        | 1.0                               | 210 | 1.0          | 1.0                               |
| 13 – 15                              | 646  | 1.2         | 1.1 (0.9, 1.3)                    | 42 | 0.8        | 0.8 (0.5, 1.3)                    | 354 | 1.3          | 1.2 (1.0, 1.5)                    |
| ≥16                                  | 246  | 1.2         | 0.8 (0.7, 1.0)                    | 9  | 0.5        | 0.4 (0.2, 0.9)                    | 123 | 1.3          | 1.0 (0.7, 1.3)                    |
| <b>Smoking status at interview</b>   |      |             |                                   |    |            |                                   |     |              |                                   |
| Never smoker                         | 630  | 1.0         | 1.0                               | 42 | 1.0        | 1.0                               | 368 | 1.0          | 1.0                               |
| Former smoker                        | 318  | 1.2         | 1.2 (1.0, 1.4)                    | 18 | 1.0        | 0.9 (0.5, 1.6)                    | 168 | 1.0          | 1.0 (0.8, 1.3)                    |
| Current smoker                       | 495  | 1.1         | 1.4 (1.2, 1.6)                    | 45 | 1.5        | 1.4 (0.9, 2.2)                    | 194 | 0.8          | 0.8 (0.7, 1.0)                    |

<sup>a</sup> Adjusted for exposure year, maternal age, parity, education level at interview, smoking status at interview

**eTable 1, continued. Crude and Adjusted<sup>a</sup> Association of Maternal Characteristics with Pregnancy Outcome among Singleton Pregnancies, Mid-Ohio Valley, 1990-2006**

| Maternal Characteristic              | N   | Preterm Birth |                                   | N  | Term Low Birthweight |                                   | N   | Birth Defect |                                   |
|--------------------------------------|-----|---------------|-----------------------------------|----|----------------------|-----------------------------------|-----|--------------|-----------------------------------|
|                                      |     | Crude OR      | Adjusted <sup>a</sup> OR (95% CI) |    | Crude OR             | Adjusted <sup>a</sup> OR (95% CI) |     | Crude OR     | Adjusted <sup>a</sup> OR (95% CI) |
| <b>Exposure Year</b>                 |     |               |                                   |    |                      |                                   |     |              |                                   |
| 1990 – 1994                          | 474 | 1.0           | 1.0                               | 50 | 1.0                  | 1.0                               | 157 | 1.0          | 1.0                               |
| 1995 – 1999                          | 574 | 1.3           | 1.3 (1.1, 1.4)                    | 42 | 0.9                  | 0.9 (0.6, 1.4)                    | 147 | 1.0          | 1.0 (0.8, 1.2)                    |
| 2000 – 2005                          | 795 | 1.8           | 1.9 (1.6, 2.1)                    | 41 | 0.9                  | 0.9 (0.6, 1.4)                    | 145 | 0.9          | 0.9 (0.7, 1.2)                    |
| <b>Age, years</b>                    |     |               |                                   |    |                      |                                   |     |              |                                   |
| 14 – 20                              | 337 | 1.0           | 1.0 (0.8, 1.1)                    | 36 | 1.7                  | 1.4 (0.9, 2.2)                    | 94  | 1.2          | 1.0 (0.7, 1.3)                    |
| 20 – 24                              | 632 | 1.0           | 1.0                               | 39 | 1.0                  | 1.0                               | 157 | 1.0          | 1.0                               |
| 25 – 29                              | 504 | 1.0           | 1.0 (0.9, 1.2)                    | 37 | 1.1                  | 1.4 (0.9, 2.2)                    | 114 | 0.9          | 1.0 (0.8, 1.3)                    |
| 30 – 34                              | 276 | 1.0           | 1.1 (0.9, 1.3)                    | 16 | 0.9                  | 1.2 (0.7, 2.2)                    | 56  | 0.8          | 1.0 (0.7, 1.4)                    |
| 35 – 45                              | 94  | 1.0           | 1.1 (0.9, 1.4)                    | 5  | 0.9                  | 1.2 (0.5, 3.3)                    | 28  | 1.2          | 1.5 (0.9, 2.3)                    |
| <b>Parity</b>                        |     |               |                                   |    |                      |                                   |     |              |                                   |
| 0                                    | 887 | 1.0           | 1.0                               | 56 | 1.0                  | 1.0                               | 223 | 1.0          | 1.0                               |
| 1                                    | 661 | 1.0           | 0.9 (0.8, 1.0)                    | 49 | 1.1                  | 1.1 (0.8, 1.6)                    | 150 | 0.8          | 0.8 (0.7, 1.0)                    |
| 2+                                   | 295 | 0.8           | 0.7 (0.6, 0.8)                    | 28 | 1.1                  | 1.1 (0.6, 1.8)                    | 76  | 0.8          | 0.7 (0.5, 1.0)                    |
| <b>Education at interview, years</b> |     |               |                                   |    |                      |                                   |     |              |                                   |
| <12                                  | 170 | 1.1           | 1.0 (0.8, 1.3)                    | 26 | 1.9                  | 1.4 (0.8, 2.4)                    | 54  | 1.3          | 1.2 (0.9, 1.7)                    |
| 12                                   | 631 | 1.0           | 1.0                               | 58 | 1.0                  | 1.0                               | 164 | 1.0          | 1.0                               |
| 13 – 15                              | 781 | 1.0           | 1.0 (0.8, 1.1)                    | 40 | 0.5                  | 0.6 (0.4, 0.9)                    | 187 | 0.9          | 0.9 (0.7, 1.1)                    |
| ≥16                                  | 261 | 0.9           | 0.9 (0.7, 1.0)                    | 9  | 0.3                  | 0.5 (0.2, 1.0)                    | 44  | 0.6          | 0.6 (0.4, 0.9)                    |
| <b>Smoking status at interview</b>   |     |               |                                   |    |                      |                                   |     |              |                                   |
| Never smoker                         | 819 | 1.0           | 1.0                               | 30 | 1.0                  | 1.0                               | 178 | 1.0          | 1.0                               |
| Former smoker                        | 365 | 1.0           | 1.0 (0.9, 1.2)                    | 19 | 1.5                  | 1.4 (0.8, 2.6)                    | 92  | 1.2          | 1.2 (0.9, 1.5)                    |
| Current smoker                       | 659 | 1.2           | 1.1 (1.0, 1.3)                    | 84 | 4.1                  | 3.3 (2.1, 5.3)                    | 179 | 1.4          | 1.3 (1.0, 1.6)                    |

<sup>a</sup> Adjusted for exposure year, maternal age, parity, education level at interview, smoking status at interview

**eTable 2. Crude and Adjusted<sup>a</sup> Association of Estimated Maternal PFOA Serum Concentration Using Standard or Bayesian Calibration with Pregnancy Outcome among Singleton Pregnancies, Mid-Ohio Valley, 1990-2006**

|                                   | N    | Miscarriage |                                   | N   | Stillbirth |                                   | N   | Preeclampsia |                                   |
|-----------------------------------|------|-------------|-----------------------------------|-----|------------|-----------------------------------|-----|--------------|-----------------------------------|
|                                   |      | Crude OR    | Adjusted <sup>a</sup> OR (95% CI) |     | Crude OR   | Adjusted <sup>a</sup> OR (95% CI) |     | Crude OR     | Adjusted <sup>a</sup> OR (95% CI) |
| <b>Standard Calibration</b>       |      |             |                                   |     |            |                                   |     |              |                                   |
| IQR(lnPFOA) <sup>b</sup> increase | 1443 | 1.01        | 0.97 (0.89, 1.05)                 | 105 | 1.00       | 1.01 (0.80, 1.26)                 | 730 | 1.09         | 1.09 (0.98, 1.21)                 |
| 100 ng/mL increase                | 1443 | 1.00        | 1.00 (0.94, 1.05)                 | 105 | 0.89       | 0.90 (0.69, 1.17)                 | 730 | 0.98         | 1.02 (0.96, 1.09)                 |
| <40 <sup>th</sup> percentile      | 558  | 1.0         | 1.0                               | 37  | 1.0        | 1.0                               | 253 | 1.0          | 1.0                               |
| 0.05 – <9.6 ng/mL                 |      |             |                                   |     |            |                                   |     |              |                                   |
| 40 – <60 <sup>th</sup> percentile | 303  | 1.1         | 1.0 (0.8, 1.2)                    | 23  | 1.3        | 1.3 (0.8, 2.2)                    | 149 | 1.2          | 1.1 (0.9, 1.4)                    |
| 9.6 – <17.0 ng/mL                 |      |             |                                   |     |            |                                   |     |              |                                   |
| 60 – <80 <sup>th</sup> percentile | 286  | 1.0         | 0.9 (0.7, 1.1)                    | 30  | 1.6        | 1.6 (0.9, 2.7)                    | 172 | 1.3          | 1.1 (0.9, 1.4)                    |
| 17.0 – <39.6 ng/mL                |      |             |                                   |     |            |                                   |     |              |                                   |
| ≥80 <sup>th</sup> percentile      | 296  | 1.1         | 1.0 (0.9, 1.2)                    | 15  | 0.8        | 0.9 (0.5, 1.6)                    | 156 | 1.2          | 1.2 (1.0, 1.5)                    |
| 39.6 – 3971.2 ng/mL               |      |             |                                   |     |            |                                   |     |              |                                   |
| <b>Bayesian Calibration</b>       |      |             |                                   |     |            |                                   |     |              |                                   |
| IQR(lnPFOA) <sup>c</sup> increase | 1443 | 0.98        | 0.94 (0.86, 1.04)                 | 105 | 0.95       | 0.97 (0.75, 1.26)                 | 730 | 1.16         | 1.16 (1.03, 1.30)                 |
| 100 ng/mL increase                | 1443 | 0.98        | 0.99 (0.93, 1.05)                 | 105 | 0.83       | 0.85 (0.65, 1.13)                 | 730 | 1.01         | 1.05 (0.99, 1.12)                 |
| <40 <sup>th</sup> percentile      | 570  | 1.0         | 1.0                               | 36  | 1.0        | 1.0                               | 228 | 1.0          | 1.0                               |
| 3.9 – <6.9 ng/mL                  |      |             |                                   |     |            |                                   |     |              |                                   |
| 40 – <60 <sup>th</sup> percentile | 295  | 1.0         | 0.9 (0.8, 1.1)                    | 24  | 1.3        | 1.3 (0.8, 2.3)                    | 157 | 1.4          | 1.2 (1.0, 1.5)                    |
| 6.9 – <15.1 ng/mL                 |      |             |                                   |     |            |                                   |     |              |                                   |
| 60 – <80 <sup>th</sup> percentile | 299  | 1.0         | 0.9 (0.7, 1.0)                    | 29  | 1.6        | 1.6 (0.9, 2.8)                    | 181 | 1.6          | 1.3 (1.1, 1.7)                    |
| 15.1 – <40.1 ng/mL                |      |             |                                   |     |            |                                   |     |              |                                   |
| ≥80 <sup>th</sup> percentile      | 279  | 1.0         | 0.9 (0.8, 1.1)                    | 16  | 0.9        | 0.9 (0.5, 1.7)                    | 164 | 1.4          | 1.4 (1.1, 1.7)                    |
| 40.1 – 3531.8 ng/mL               |      |             |                                   |     |            |                                   |     |              |                                   |

<sup>a</sup> Adjusted for exposure year, maternal age, parity, education level at interview, smoking status at interview

<sup>b</sup> Effect estimates represent the change in outcome for a shift from the 25th percentile to the 75th percentile in estimated PFOA serum levels (IQR (lnPFOA) = 1.60)

<sup>c</sup> Effect estimates represent the change in outcome for a shift from the 25th percentile to the 75th percentile in estimated PFOA serum levels (IQR (lnPFOA) = 1.81)

**eTable 2, continued. Crude and Adjusted<sup>a</sup> Association of Estimated Maternal PFOA Serum Concentration Using Standard or Bayesian Calibration with Pregnancy Outcome among Singleton Pregnancies, Mid-Ohio Valley, 1990-2006**

|                                   | N    | Preterm Birth |                                   | N   | Term Low Birthweight |                                   | N   | Birth Defect |                                   |
|-----------------------------------|------|---------------|-----------------------------------|-----|----------------------|-----------------------------------|-----|--------------|-----------------------------------|
|                                   |      | Crude OR      | Adjusted <sup>a</sup> OR (95% CI) |     | Crude OR             | Adjusted <sup>a</sup> OR (95% CI) |     | Crude OR     | Adjusted <sup>a</sup> OR (95% CI) |
| <b>Standard Calibration</b>       |      |               |                                   |     |                      |                                   |     |              |                                   |
| IQR(lnPFOA) <sup>b</sup> increase | 1843 | 1.00          | 0.98 (0.91, 1.05)                 | 133 | 0.86                 | 0.92 (0.73, 1.15)                 | 449 | 1.00         | 1.02 (0.90, 1.15)                 |
| 100 ng/mL increase                | 1843 | 0.98          | 1.00 (0.93, 1.08)                 | 133 | 0.84                 | 0.88 (0.67, 1.14)                 | 449 | 1.03         | 1.03 (0.94, 1.13)                 |
| <40 <sup>th</sup> percentile      | 720  | 1.0           | 1.0                               | 56  | 1.0                  | 1.0                               | 179 | 1.0          | 1.0                               |
| 0.05 – <9.6 ng/mL                 |      |               |                                   |     |                      |                                   |     |              |                                   |
| 40 – <60 <sup>th</sup> percentile | 384  | 1.1           | 1.0 (0.9, 1.2)                    | 30  | 1.1                  | 1.1 (0.7, 1.7)                    | 90  | 1.0          | 1.0 (0.8, 1.3)                    |
| 9.6 – <17.0 ng/mL                 |      |               |                                   |     |                      |                                   |     |              |                                   |
| 60 – <80 <sup>th</sup> percentile | 411  | 1.2           | 1.1 (0.9, 1.3)                    | 23  | 0.8                  | 0.8 (0.5, 1.4)                    | 88  | 1.0          | 1.0 (0.8, 1.3)                    |
| 17.0 – <39.6 ng/mL                |      |               |                                   |     |                      |                                   |     |              |                                   |
| ≥80 <sup>th</sup> percentile      | 328  | 0.9           | 0.9 (0.8, 1.1)                    | 24  | 0.7                  | 0.9 (0.5, 1.4)                    | 92  | 1.0          | 1.1 (0.8, 1.4)                    |
| 39.6 – 3971.2 ng/mL               |      |               |                                   |     |                      |                                   |     |              |                                   |
| <b>Bayesian Calibration</b>       |      |               |                                   |     |                      |                                   |     |              |                                   |
| IQR(lnPFOA) <sup>c</sup> increase | 1843 | 0.99          | 0.98 (0.91, 1.07)                 | 133 | 0.86                 | 0.95 (0.71, 1.27)                 | 449 | 1.02         | 1.04 (0.90, 1.20)                 |
| 100 ng/mL increase                | 1843 | 0.98          | 1.02 (0.95, 1.08)                 | 133 | 0.94                 | 0.99 (0.81, 1.22)                 | 449 | 1.05         | 1.05 (0.97, 1.14)                 |
| <40 <sup>th</sup> percentile      | 696  | 1.0           | 1.0                               | 62  | 1.0                  | 1.0                               | 183 | 1.0          | 1.0                               |
| 3.9 – <6.9 ng/mL                  |      |               |                                   |     |                      |                                   |     |              |                                   |
| 40 – <60 <sup>th</sup> percentile | 394  | 1.2           | 1.0 (0.9, 1.2)                    | 27  | 0.9                  | 0.9 (0.6, 1.5)                    | 86  | 0.9          | 0.9 (0.7, 1.2)                    |
| 6.9 – <15.1 ng/mL                 |      |               |                                   |     |                      |                                   |     |              |                                   |
| 60 – <80 <sup>th</sup> percentile | 416  | 1.2           | 1.1 (0.9, 1.3)                    | 19  | 0.6                  | 0.7 (0.4, 1.2)                    | 87  | 0.9          | 0.9 (0.7, 1.2)                    |
| 15.1 – <40.1 ng/mL                |      |               |                                   |     |                      |                                   |     |              |                                   |
| ≥80 <sup>th</sup> percentile      | 337  | 1.0           | 1.0 (0.8, 1.1)                    | 25  | 0.7                  | 0.9 (0.5, 1.4)                    | 93  | 1.0          | 1.0 (0.8, 1.4)                    |
| 40.1 – 3531.8 ng/mL               |      |               |                                   |     |                      |                                   |     |              |                                   |

<sup>a</sup> Adjusted for exposure year, maternal age, parity, education level at interview, smoking status at interview

<sup>b</sup> Effect estimates represent the change in outcome for a shift from the 25th percentile to the 75th percentile in estimated PFOA serum levels (IQR (lnPFOA) = 1.60)

<sup>c</sup> Effect estimates represent the change in outcome for a shift from the 25th percentile to the 75th percentile in estimated PFOA serum levels (IQR (lnPFOA) = 1.81)

**eTable 3. Crude and Adjusted<sup>a</sup> Association of Estimated Maternal PFOA Serum Concentration with Pregnancy Outcome among Singleton Pregnancies with Varying Duration of Highest Quality Exposure Measures, Mid-Ohio Valley, 1990-2006**

|                                   | N   | Miscarriage |                                   | N  | Stillbirth |                                   | N   | Preeclampsia |                                   |  |
|-----------------------------------|-----|-------------|-----------------------------------|----|------------|-----------------------------------|-----|--------------|-----------------------------------|--|
|                                   |     | Crude OR    | Adjusted <sup>a</sup> OR (95% CI) |    | Crude OR   | Adjusted <sup>a</sup> OR (95% CI) |     | Crude OR     | Adjusted <sup>a</sup> OR (95% CI) |  |
| 6 years, n=6,358                  |     |             |                                   |    |            |                                   |     |              |                                   |  |
| IQR(lnPFOA) <sup>b</sup> increase | 799 | 0.96        | 0.94 (0.83, 1.07)                 | 52 | 0.98       | 1.01 (0.69, 1.48)                 | 407 | 1.23         | 1.22 (1.03, 1.43)                 |  |
| 100 ng/mL increase                | 799 | 1.00        | 0.99 (0.94, 1.05)                 | 52 | 0.89       | 0.91 (0.69, 1.20)                 | 407 | 1.08         | 1.10 (1.02, 1.18)                 |  |
| <40th percentile                  | 326 | 1.0         | 1.0                               | 19 | 1.0        | 1.0                               | 129 | 1.0          | 1.0                               |  |
| 3.9 – <6.2 ng/mL                  |     |             |                                   |    |            |                                   |     |              |                                   |  |
| 40 – <60th percentile             | 154 | 0.9         | 0.9 (0.7, 1.1)                    | 10 | 1.1        | 0.9 (0.4, 2.0)                    | 96  | 1.4          | 1.4 (1.0, 1.8)                    |  |
| 6.2 – <18.3 ng/mL                 |     |             |                                   |    |            |                                   |     |              |                                   |  |
| 60 – <80th percentile             | 167 | 1.0         | 0.9 (0.7, 1.1)                    | 16 | 1.7        | 1.6 (0.8, 3.2)                    | 84  | 1.3          | 1.2 (0.9, 1.6)                    |  |
| 18.3 – <66.4 ng/mL                |     |             |                                   |    |            |                                   |     |              |                                   |  |
| ≥80th percentile                  | 152 | 0.9         | 0.9 (0.7, 1.1)                    | 7  | 0.7        | 0.8 (0.3, 1.8)                    | 98  | 1.5          | 1.4 (1.1, 1.9)                    |  |
| 66.4 – 934.3 ng/mL                |     |             |                                   |    |            |                                   |     |              |                                   |  |
| 16 years, n=4,253                 |     |             |                                   |    |            |                                   |     |              |                                   |  |
| IQR(lnPFOA) <sup>c</sup> increase | 536 | 0.98        | 0.94 (0.81, 1.10)                 | 32 | 1.05       | 1.07 (0.70, 1.64)                 | 288 | 1.28         | 1.26 (1.05, 1.51)                 |  |
| 100 ng/mL increase                | 536 | 1.00        | 0.99 (0.92, 1.07)                 | 32 | 0.96       | 0.96 (0.67, 1.38)                 | 288 | 1.12         | 1.12 (1.02, 1.22)                 |  |
| <40 <sup>th</sup> percentile      | 213 | 1.0         | 1.0                               | 10 | 1.0        | 1.0                               | 92  | 1.0          | 1.0                               |  |
| 3.9 – <5.7 ng/mL                  |     |             |                                   |    |            |                                   |     |              |                                   |  |
| 40 – <60 <sup>th</sup> percentile | 104 | 1.0         | 0.9 (0.7, 1.2)                    | 8  | 1.6        | 1.6 (0.6, 4.2)                    | 57  | 1.2          | 1.2 (0.8, 1.7)                    |  |
| 5.7 – <15.6 ng/mL                 |     |             |                                   |    |            |                                   |     |              |                                   |  |
| 60 – <80 <sup>th</sup> percentile | 116 | 1.1         | 0.9 (0.7, 1.3)                    | 11 | 2.2        | 2.4 (0.9, 6.4)                    | 68  | 1.5          | 1.4 (1.0, 2.0)                    |  |
| 15.6 – <55.6 ng/mL                |     |             |                                   |    |            |                                   |     |              |                                   |  |
| ≥80 <sup>th</sup> percentile      | 103 | 1.0         | 0.9 (0.7, 1.2)                    | 3  | 0.6        | 0.6 (0.2, 2.3)                    | 71  | 1.5          | 1.4 (1.0, 2.0)                    |  |
| 55.6 – 934.3 ng/mL                |     |             |                                   |    |            |                                   |     |              |                                   |  |

<sup>a</sup> Adjusted for exposure year, maternal age, parity, education level at interview, smoking status at interview

<sup>b</sup> Effect estimates represent the change in outcome for a shift from the 25th percentile to the 75th percentile in estimated PFOA serum levels (IQR (lnPFOA) = 2.27)

<sup>c</sup> Effect estimates represent the change in outcome for a shift from the 25th percentile to the 75th percentile in estimated PFOA serum levels (IQR (lnPFOA) = 2.08)

**eTable 3, continued. Crude and Adjusted<sup>a</sup> Association of Estimated Maternal PFOA Serum Concentration with Pregnancy Outcome among Singleton Pregnancies with Varying Duration of Highest Quality Exposure Measures, Mid-Ohio Valley, 1990-2006**

|                                   | N    | Preterm Birth |                                   | N  | Term Low Birthweight |                                   | N   | Birth Defect |                                   |  |
|-----------------------------------|------|---------------|-----------------------------------|----|----------------------|-----------------------------------|-----|--------------|-----------------------------------|--|
|                                   |      | Crude OR      | Adjusted <sup>a</sup> OR (95% CI) |    | Crude OR             | Adjusted <sup>a</sup> OR (95% CI) |     | Crude OR     | Adjusted <sup>a</sup> OR (95% CI) |  |
| 6 years, n=6,358                  |      |               |                                   |    |                      |                                   |     |              |                                   |  |
| IQR(lnPFOA) <sup>b</sup> increase | 1011 | 1.04          | 0.99 (0.88, 1.11)                 | 76 | 0.85                 | 0.97 (0.65, 1.43)                 | 247 | 0.97         | 0.98 (0.81, 1.19)                 |  |
| 100 ng/mL increase                | 1011 | 1.00          | 0.99 (0.94, 1.05)                 | 76 | 0.89                 | 0.96 (0.78, 1.18)                 | 247 | 0.96         | 0.97 (0.88, 1.07)                 |  |
| <40th percentile                  | 379  | 1.0           | 1.0                               | 28 | 1.0                  | 1.0                               | 97  | 1.0          | 1.0                               |  |
| 3.9 – <6.2 ng/mL                  |      |               |                                   |    |                      |                                   |     |              |                                   |  |
| 40 – <60th percentile             | 232  | 1.3           | 1.1 (0.9, 1.3)                    | 19 | 1.4                  | 1.4 (0.8, 2.5)                    | 53  | 1.1          | 1.1 (0.8, 1.5)                    |  |
| 6.2 – <18.3 ng/mL                 |      |               |                                   |    |                      |                                   |     |              |                                   |  |
| 60 – <80th percentile             | 196  | 1.1           | 0.9 (0.7, 1.1)                    | 16 | 1.1                  | 1.2 (0.6, 2.3)                    | 50  | 1.0          | 1.0 (0.7, 1.4)                    |  |
| 18.3 – <66.4 ng/mL                |      |               |                                   |    |                      |                                   |     |              |                                   |  |
| ≥80th percentile                  | 204  | 1.1           | 1.0 (0.8, 1.2)                    | 13 | 0.9                  | 1.1 (0.5, 2.3)                    | 47  | 1.0          | 1.0 (0.7, 1.4)                    |  |
| 66.4 – 934.3 ng/mL                |      |               |                                   |    |                      |                                   |     |              |                                   |  |
| 16 years, n=4,253                 |      |               |                                   |    |                      |                                   |     |              |                                   |  |
| IQR(lnPFOA) <sup>c</sup> increase | 696  | 1.05          | 0.97 (0.84, 1.11)                 | 45 | 0.70                 | 0.80 (0.49, 1.29)                 | 171 | 0.90         | 0.94 (0.75, 1.18)                 |  |
| 100 ng/mL increase                | 696  | 1.00          | 0.99 (0.92, 1.07)                 | 45 | 0.72                 | 0.79 (0.54, 1.17)                 | 171 | 0.93         | 0.94 (0.82, 1.08)                 |  |
| <40 <sup>th</sup> percentile      | 259  | 1.0           | 1.0                               | 17 | 1.0                  | 1.0                               | 72  | 1.0          | 1.0                               |  |
| 3.9 – <5.7 ng/mL                  |      |               |                                   |    |                      |                                   |     |              |                                   |  |
| 40 – <60 <sup>th</sup> percentile | 157  | 1.3           | 1.1 (0.9, 1.4)                    | 15 | 1.9                  | 1.8 (0.9, 3.8)                    | 37  | 1.0          | 1.1 (0.7, 1.7)                    |  |
| 5.7 – <15.6 ng/mL                 |      |               |                                   |    |                      |                                   |     |              |                                   |  |
| 60 – <80 <sup>th</sup> percentile | 141  | 1.2           | 1.0 (0.8, 1.2)                    | 7  | 0.8                  | 0.8 (0.3, 2.3)                    | 32  | 0.9          | 0.9 (0.6, 1.5)                    |  |
| 15.6 – <55.6 ng/mL                |      |               |                                   |    |                      |                                   |     |              |                                   |  |
| ≥80 <sup>th</sup> percentile      | 139  | 1.1           | 1.0 (0.7, 1.2)                    | 6  | 0.7                  | 0.9 (0.3, 2.4)                    | 30  | 0.8          | 0.9 (0.6, 1.4)                    |  |
| 55.6 – 934.33 ng/mL               |      |               |                                   |    |                      |                                   |     |              |                                   |  |

<sup>a</sup> Adjusted for exposure year, maternal age, parity, education level at interview, smoking status at interview

<sup>b</sup> Effect estimates represent the change in outcome for a shift from the 25th percentile to the 75th percentile in estimated PFOA serum levels (IQR (lnPFOA) = 2.27)

<sup>c</sup> Effect estimates represent the change in outcome for a shift from the 25th percentile to the 75th percentile in estimated PFOA serum levels (IQR (lnPFOA) = 2.08)

**eTable 4. Crude and Adjusted<sup>a</sup> Association of Estimated Maternal PFOA Serum Concentration with Preeclampsia stratified by year, among Singleton Live Births, Mid-Ohio Valley, 1990-2006**

| Estimated PFOA                    | N   | 1990-1994 |                                   | N   | 1995-1999 |                                   | N   | 2000-2005 |                                   |
|-----------------------------------|-----|-----------|-----------------------------------|-----|-----------|-----------------------------------|-----|-----------|-----------------------------------|
|                                   |     | Crude OR  | Adjusted <sup>a</sup> OR (95% CI) |     | Crude OR  | Adjusted <sup>a</sup> OR (95% CI) |     | Crude OR  | Adjusted <sup>a</sup> OR (95% CI) |
| IQR(lnPFOA) <sup>b</sup> increase | 179 | 1.05      | 1.07 (0.85, 1.35)                 | 235 | 1.18      | 1.16 (0.94, 1.42)                 | 316 | 1.20      | 1.17 (0.97, 1.42)                 |
| 100 ng/mL increase                | 179 | 1.01      | 1.04 (0.92, 1.17)                 | 235 | 1.09      | 1.09 (0.96, 1.24)                 | 316 | 1.10      | 1.09 (1.00, 1.19)                 |
| <40 <sup>th</sup> percentile      | 94  | 1.0       | 1.0                               | 75  | 1.0       | 1.0                               | 68  | 1.0       | 1.0                               |
| 3.9 – <6.8 ng/mL                  |     |           |                                   |     |           |                                   |     |           |                                   |
| 40 – <60 <sup>th</sup> percentile | 31  | 1.0       | 1.0 (0.7, 1.6)                    | 54  | 1.4       | 1.3 (0.9, 1.9)                    | 87  | 1.5       | 1.5 (1.1, 2.2)                    |
| 6.8 – <16.6 ng/mL                 |     |           |                                   |     |           |                                   |     |           |                                   |
| 60 – <80 <sup>th</sup> percentile | 18  | 0.8       | 0.8 (0.5, 1.3)                    | 52  | 1.4       | 1.4 (0.9, 2.0)                    | 84  | 1.3       | 1.3 (0.9, 1.8)                    |
| 16.6 – <63.1 ng/mL                |     |           |                                   |     |           |                                   |     |           |                                   |
| ≥80 <sup>th</sup> percentile      | 36  | 1.2       | 1.2 (0.8, 1.9)                    | 54  | 1.3       | 1.3 (0.9, 1.8)                    | 77  | 1.5       | 1.4 (1.0, 2.0)                    |
| 63.1 – 934.3 ng/mL                |     |           |                                   |     |           |                                   |     |           |                                   |

<sup>a</sup> Adjusted for exposure year, maternal age, parity, education level at interview, smoking status at interview

<sup>b</sup> Effect estimates represent the change in outcome for a shift from the 25th percentile to the 75th percentile in estimated PFOA serum levels (IQR (lnPFOA) = 2.19)



**eTable 5. Crude and Adjusted<sup>a</sup> Association of Estimated Maternal PFOA Serum Concentration with Birth Defects among Singleton Live Births, Mid-Ohio Valley, 1990-2006**

| Estimated PFOA                    | Congenital Heart Defect |          |                                   | Club or Other Foot Defect |          |                                   | Oral Clefts |          |                                   | Genital or Urinary Defect |          |                                   | Eye Defect |          |                                   |
|-----------------------------------|-------------------------|----------|-----------------------------------|---------------------------|----------|-----------------------------------|-------------|----------|-----------------------------------|---------------------------|----------|-----------------------------------|------------|----------|-----------------------------------|
|                                   | N                       | Crude OR | Adjusted <sup>a</sup> OR (95% CI) | N                         | Crude OR | Adjusted <sup>a</sup> OR (95% CI) | N           | Crude OR | Adjusted <sup>a</sup> OR (95% CI) | N                         | Crude OR | Adjusted <sup>a</sup> OR (95% CI) | N          | Crude OR | Adjusted <sup>a</sup> OR (95% CI) |
| IQR(lnPFOA) <sup>b</sup> increase | 79                      | 1.27     | 1.31 (0.95, 1.79)                 | 17                        | 0.99     | 0.99 (0.46, 2.13)                 | 16          | 0.91     | 0.94 (0.44, 1.97)                 | 31                        | 1.23     | 1.18 (0.76, 1.84)                 | 31         | 1.11     | 1.06 (0.59, 1.93)                 |
| 100 ng/mL increase                | 79                      | 1.11     | 1.13 (0.96, 1.33)                 | 17                        | 0.93     | 0.94 (0.65, 1.35)                 | 16          | 0.97     | 0.97 (0.65, 1.43)                 | 31                        | 1.00     | 0.98 (0.79, 1.20)                 | 31         | 1.15     | 1.15 (0.89, 1.49)                 |
| <40 <sup>th</sup> percentile      | 25                      | 1.0      | 1.0                               | 6                         | 1.0      | 1.0                               | 5           | 1.0      | 1.0                               | 12                        | 1.0      | 1.0                               | 13         | 1.0      | 1.0                               |
| 3.9 – <6.8 ng/mL                  |                         |          |                                   |                           |          |                                   |             |          |                                   |                           |          |                                   |            |          |                                   |
| ≥40 <sup>th</sup> percentile      | 54                      | 1.4      | 1.5 (0.9, 2.4)                    | 11                        | 1.2      | 1.1 (0.4, 3.1)                    | 11          | 1.5      | 1.6 (0.6, 4.6)                    | 19                        | 1.0      | 1.0 (0.5, 2.0)                    | 18         | 0.9      | 0.9 (0.4, 1.9)                    |
| 6.8 – 934.3 ng/mL                 |                         |          |                                   |                           |          |                                   |             |          |                                   |                           |          |                                   |            |          |                                   |

<sup>a</sup> Adjusted for exposure year, maternal age, parity, education level at interview, smoking status at interview

<sup>b</sup> Effect estimates represent the change in outcome for a shift from the 25th percentile to the 75th percentile in estimated PFOA serum levels (IQR (lnPFOA) = 2.19)

1 **eAppendix 2: Bayesian calibration with a multivariate normal prior distribution and**  
2 **standard calibration methods**

3  
4 *Overview*

5 The idea of calibration is to take advantage of the 2005-2006 serum measurements,  
6 adjusting the historical exposure estimates to make them more closely match the observed serum  
7 concentrations. However, PFOA serum concentrations mostly reflect PFOA exposures  
8 experience during the 5 or 10 years prior to the time of measurement, and some participants'  
9 water consumption behaviors likely changed after they became aware of local water  
10 contamination. Rather than adjusting the entire history of exposure estimates by some constant  
11 fraction (a traditional form of calibration), we developed a time-dependent Bayesian calibration  
12 that relies on a pharmacokinetic model, resulting in larger adjustments to more recent exposure  
13 estimates and smaller adjustments to exposure estimates for years farther in the past.

14 We performed Bayesian calibration of the annual exposure estimates for each individual,  
15 using the annual fate and transport model predictions as the prior mean and the measured 2005-  
16 2006 PFOA serum concentration as the updating datum. The model for the likelihood function is  
17 a discrete-time single compartment pharmacokinetic model, previously used for PFOA and other  
18 contaminants (Bartell et al., 2004; Hoffman et al., 2010; Shin et al., 2011, under review):

19 
$$C_t|I \sim N\left(\sum_{j=1}^n w_j I_j, \sigma_\varepsilon^2\right) \sim N(W'I, \sigma_\varepsilon^2)$$

20 where  $C_t$  is the observed serum concentration at the sampling year  $t$ ,  $I$  is an  $m$ -length vector of  
21 PFOA exposure rates  $I_j$  for each year of  $m$  years of life,  $W$  is a  $m$ -length vector of weights  $w_j$

22 reflecting the relative contribution of PFOA exposure in year  $j$  to the serum concentration in year  
 23  $t$ , and  $\sigma_\varepsilon^2$  is the error variance. The error term is assumed to be normally distributed, and the  
 24 weights are determined by the following function:

$$25 \quad w_j = \left( \frac{1 - e^{-k}}{k} \right) e^{-k(t-j)}$$

26 where  $k$  is an elimination rate constant ( $= 0.2$ ) corresponding to a half-life of 3.5 years (Olsen et  
 27 al. 2007).

28 Prior information from the fate and transport model is incorporated through a multivariate  
 29 normal prior:

$$30 \quad I \sim N_m(\mu, \Sigma)$$

31 where  $\mu$  is the  $m$ -length vector of year-by-year fate and transport model based exposure  
 32 estimates, and  $\Sigma$  is an  $m \times m$  covariance matrix describing the prior uncertainty regarding those  
 33 exposure estimates. The posterior distribution of the exposure vector, determined from the prior  
 34 and likelihood, is also multivariate normal:

$$35 \quad I | C_t \sim N_m(M, S)$$

$$36 \quad \text{where } \mathbf{M} = \mathbf{S}' \Sigma^{-1} \boldsymbol{\mu} + \mathbf{S}' \mathbf{W} \cdot \sigma_\varepsilon^{-2} \cdot \mathbf{C}_t = \mathbf{S}' (\Sigma^{-1} \boldsymbol{\mu} + \mathbf{W} \mathbf{C}_t \cdot \sigma_\varepsilon^{-2})$$

$$37 \quad \text{and } \mathbf{S} = (\Sigma^{-1} + \mathbf{W} \cdot \mathbf{W}' \cdot \sigma_\varepsilon^{-2})^{-1} .$$

38 We also rely on a prior estimate of  $\sigma_\varepsilon^2$ , assumed here to be the square of 10 % of  $C_t$ , and  
 39  $\Sigma$ , assumed here to be a diagonal matrix with variances equal to the square of 400 % of  $\mu$ . The  
 40 posterior mean vector,  $M$ , expresses the calibrated annual exposure estimates for the participant.  
 41 In some cases  $M$  includes one or more negative values; we substituted zeros for these values in  
 42 order to ensure that all annual exposure estimates were non-negative.



44 *Derivation*

45 Using the fact that posterior probability density ( $\rho$ ) for the vector of annual exposures is  
46 proportional to the product of the prior density ( $\pi$ ) and likelihood function ( $L$ ), we derive the  
47 posterior distribution below:

$$48 \quad \rho(I|C_t) \propto \pi(I) \cdot L(C_t|I)$$

49 1. Multiply probability density functions of prior and likelihood.

$$50 \quad \propto \left[ |\Sigma|^{-\frac{1}{2}} \cdot e^{-\frac{1}{2}(I-\mu)' \Sigma^{-1}(I-\mu)} \right] \cdot \left[ \sigma_\varepsilon^{-1} \cdot e^{-\frac{1}{2}(C_t - W'I)^2 / \sigma_\varepsilon^2} \right]$$

51 2. Drop multiplicative constants ( $|\Sigma|^{-\frac{1}{2}}, \sigma_\varepsilon^{-1}$ ) and combine the two expressions.

$$52 \quad \propto e^{-\frac{1}{2}[(I-\mu)' \Sigma^{-1}(I-\mu) + (C_t - W'I)^2 \cdot \sigma_\varepsilon^{-2}]}$$

53 3. Expand the first term and the square.

$$54 \quad \propto e^{-\frac{1}{2}[(I' \Sigma^{-1} - \mu' \Sigma^{-1})(I-\mu) + C_t^2 \sigma_\varepsilon^{-2} - 2C_t \cdot W'I \cdot \sigma_\varepsilon^{-2} + (W'I)^2 \cdot \sigma_\varepsilon^{-2}]}$$

55 4. Expand all terms.

$$56 \quad \propto e^{-\frac{1}{2}[I' \Sigma^{-1} I - 2\mu' \Sigma^{-1} I + \mu' \Sigma^{-1} \mu + C_t^2 \sigma_\varepsilon^{-2} - 2C_t \cdot W'I \cdot \sigma_\varepsilon^{-2} + W'I \cdot W'I \cdot \sigma_\varepsilon^{-2}]}$$

57 5. Drop constants  $\mu' \Sigma^{-1} \mu + C_t^2 \sigma_\varepsilon^{-2}$ .

$$58 \quad \propto e^{-\frac{1}{2}[I' \Sigma^{-1} I - 2\mu' \Sigma^{-1} I - 2C_t \cdot W'I \cdot \sigma_\varepsilon^{-2} + W'I \cdot W'I \cdot \sigma_\varepsilon^{-2}]}$$

59 6. Rearrange the terms so as to be combined.

$$60 \quad \propto e^{-\frac{1}{2}[I' \Sigma^{-1} I + I' W \cdot W' \cdot \sigma_\varepsilon^{-2} \cdot I - 2\mu' \Sigma^{-1} I - 2C_t \cdot W'I \cdot \sigma_\varepsilon^{-2}]}$$

61 7. Collect the terms.

62 
$$\propto e^{-\frac{1}{2}[\mathbf{I}'(\Sigma^{-1} + \mathbf{W} \cdot \mathbf{W}' \cdot \sigma_{\varepsilon}^{-2})\mathbf{I} - 2(\boldsymbol{\mu}'\Sigma^{-1} + \mathbf{C}_{\tau}' \cdot \mathbf{W}' \cdot \sigma_{\varepsilon}^{-2})\mathbf{I}]}$$

63 8. Write in a simpler form to see the kernel of an  $m$ -dimensional multivariate normal distribution.

64 
$$\propto e^{-\frac{1}{2}[\mathbf{X}'\mathbf{S}^{-1}\mathbf{X} - 2\mathbf{M}'\mathbf{S}^{-1}\mathbf{X}]}$$

65 where

66 
$$\mathbf{S} = (\Sigma^{-1} + \mathbf{W} \cdot \mathbf{W}' \cdot \sigma_{\varepsilon}^{-2})^{-1}$$

67 
$$\mathbf{M} = \mathbf{S}'\Sigma^{-1}\boldsymbol{\mu} + \mathbf{S}'\mathbf{W} \cdot \sigma_{\varepsilon}^{-2} \cdot \mathbf{C}_{\tau} = \mathbf{S}'(\Sigma^{-1}\boldsymbol{\mu} + \mathbf{W}\mathbf{C}_{\tau} \cdot \sigma_{\varepsilon}^{-2})$$

68 Thus, the posterior exposure estimates follow a multivariate normal distribution with mean  $\mathbf{M}$   
69 and variance  $\mathbf{S}$ .

70

71 *Standard calibration*

72 We conducted a limited single-parameter optimization to calibrate groundwater  
73 concentrations for six public wells in Shin et al. (2011b), by scaling retrospective predictions by  
74 the same multiplicative factor over the entire time course of 1951-2008 in order to best match  
75 observed water concentrations in 2000-2008. Here, we refer to that scaling factor approach as  
76 “traditional calibration”. We computed a multiplicative scaling factor,  $\varphi_i$ , for each participant  $i$  by  
77 the following equation.

78 
$$\varphi_i C_{\text{pred},i,2005} = C_{\text{obs},i,2005}$$

79 where  $\varphi_i$  is a calibration coefficient for a participant  $i$ ,  $C_{\text{obs},i,2005}$  is the observed serum  
80 concentration for a participant  $i$  taken at the serum sampling event in either 2005 or 2006, and  
81  $C_{\text{pred},i,2005}$  is the corresponding prediction of the serum concentration for a participant  $i$  from our  
82 exposure and pharmacokinetic models. Since we have one-time observation ( $t = 2005$ ),  $\varphi_i$  is

83 simply computed as  $C_{obs,i,2005} / C_{pred,i,2005}$  from the above equation and multiplied to prior  
84 predicted serum concentration ( $C_{pred,i,t}$ ) to make new predictions. This approach scales the  
85 predictions for each participant according to his or her one serum concentration measurement,  
86 while retaining the shape of each prediction curve generated from the linked exposure and  
87 pharmacokinetic model.

88

## 89 REFERENCES

90

91 SM Bartell, WC Griffith, EM Faustman. Temporal error in biomarker based mean exposure  
92 estimates for individuals. *Journal of Exposure Analysis and Environmental Epidemiology* 14(2):  
93 173-179 (2004).

94

95 K Hoffman, TF Webster, SM Bartell, MG Weisskopf, T Fletcher, VM Vieira. Private drinking  
96 water wells as a source of exposure to perfluorooctanoic acid (PFOA) in communities  
97 surrounding a fluoropolymer production facility. *Environmental Health Perspectives* 119(1): 92-  
98 97 (2011).

99

100 Olsen GW, Burris J, Ehresman D, Forehlich J, Seaca A, Butenhoff J, et al. 2007. Half-life of  
101 serum elimination of perfluorooctanesulfonate, perfluorohexanesulfonate, and  
102 perfluorooctanoate in retired fluorochemical production workers. *Environ Health Perspect*  
103 115:1298–1365.

104

105 HM Shin, VM Vieira, PB Ryan, K Steenland, SM Bartell. Retrospective exposure estimation and  
106 predicted versus observed serum perfluorooctanoic acid concentrations for participants in the C8  
107 Health Project. (in press). <http://dx.doi.org/10.1289/ehp.1103729>

108

109
